# Supplementary material for: A self-templating scheme for the synthesis of NiCo2Se4 and BiSe hollow microspheres for high-energy density asymmetric supercapacitors
Source: Royal Society of Chemistry journal article supplement (doi:10.1039/d1ce01627j), 2022-01-01
Supplement: d1ce01627j1.pdf [file d1ce01627j1.pdf]

## Supporting Information

### Self-templating Scheme for the Synthesis of NiCo<sub>2</sub>Se<sub>4</sub> and BiSe Hollow Microspheres for High-energy Density Asymmetric Supercapacitors

Jingjing Xia,<sup>a</sup> Liuming Zhang,<sup>a</sup> Shouguo Xuan,<sup>a</sup> Yonghong Ni\*,<sup>a</sup> Li Zhang\*<sup>ab</sup>

<sup>a</sup>The Key Laboratory of Functional Molecular Solids, Ministry of Education, Key Laboratory of Electrochemical Clean Energy of Anhui Higher Education Institutes, College of Chemistry and Materials Science, Anhui Normal University, Wuhu 241000, P. R. China

<sup>b</sup>School of Pharmacy, Shanghai University of Medicine and Health Sciences, Shanghai 201318, P. R. China

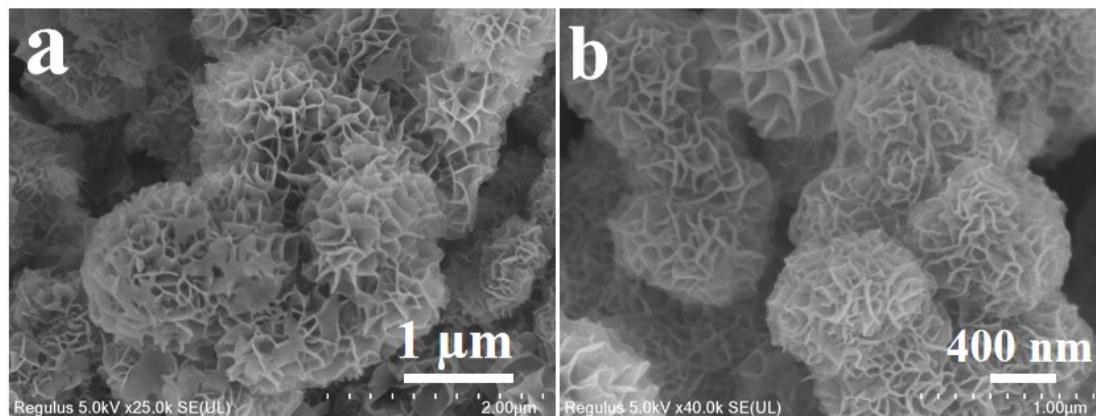

**Figure S1.** (a, b) SEM images of Ni-Co-LDH/C precursor.

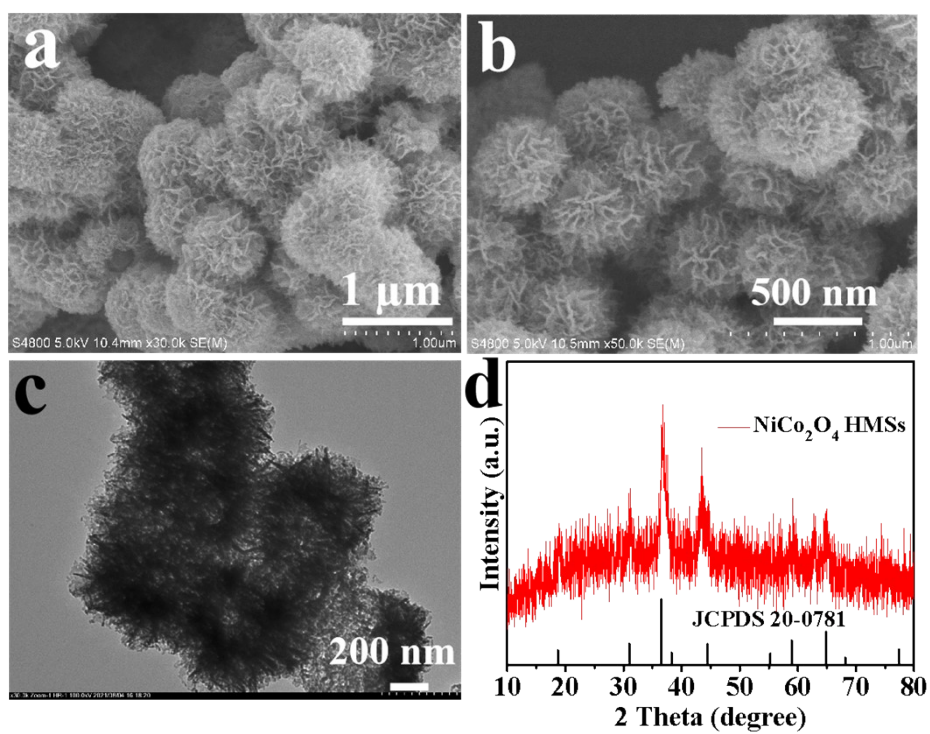

**Figure S2.** (a, b) SEM images, (c) TEM image and (d) XRD pattern of NiCo<sub>2</sub>O<sub>4</sub> HMSs.

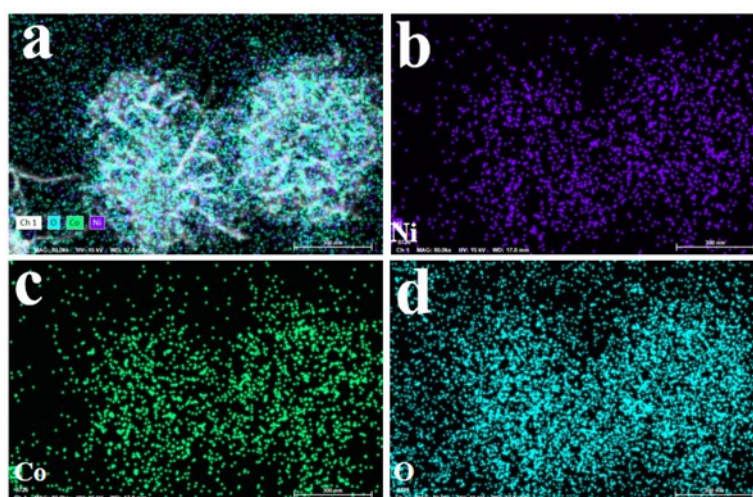

**Figure S3.** The SEM mapping images of NiCo<sub>2</sub>O<sub>4</sub> HMSs.

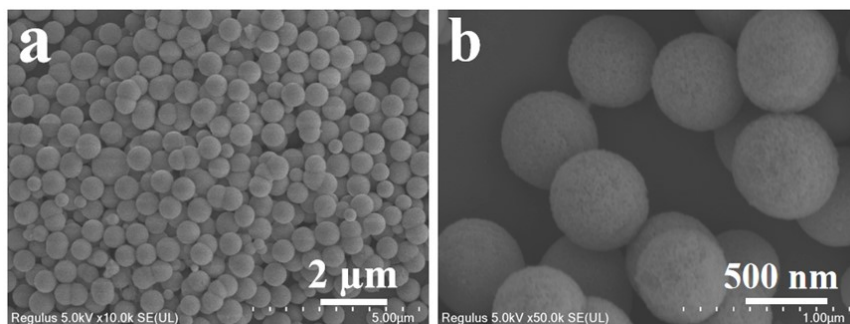

**Figure S4.** (a, b) SEM images of  $\text{Bi}_2\text{O}_3$  precursor.

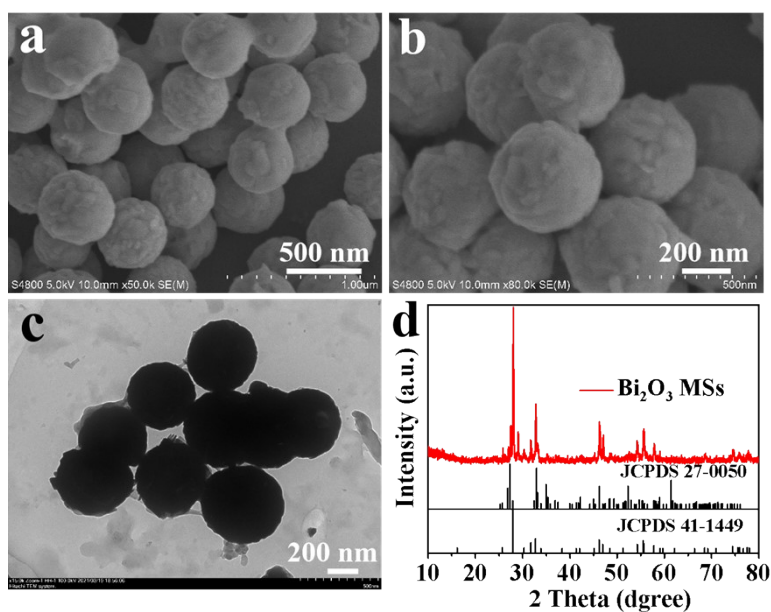

**Figure S5.** (a, b) SEM images, (c) TEM image and (d) XRD pattern of  $\text{Bi}_2\text{O}_3$  MSs.

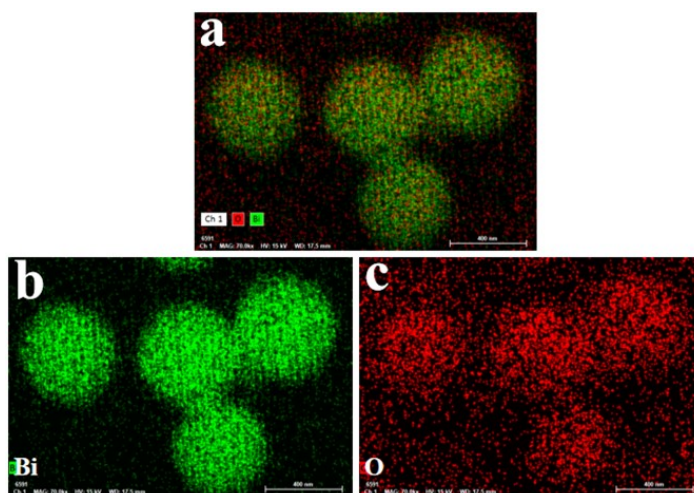

**Figure S6.** The SEM mapping images of  $\text{Bi}_2\text{O}_3$  MSs.

The low/high magnification SEM images of the precursor NiCo-LDH/C are exhibited in Fig S1. It is clearly seen that the product has a spherical morphology with nanosheets. The diameter size of NiCo-LDH/C is around 900 nm. After annealing, the surface of NiCo<sub>2</sub>O<sub>4</sub> HMSs become a little rough, and the size of the product becomes a little smaller than NiCo-LDH/C (Fig S2a, b). As shown in TEM image (Fig S2c), it is obvious observed that the product has a porous hollow spherical structure. Several featured peaks assigned to NiCo<sub>2</sub>O<sub>4</sub> (JPCDS no. 20-0781) can be revealed in the XRD pattern (Fig S2d). The SEM elemental mapping confirms that the Ni, Co and O are uniform distributed in the NiCo<sub>2</sub>O<sub>4</sub> HMSs (Fig S3).

Fig S4 shows low/high magnification SEM images of the solid spherical Bi<sub>2</sub>O<sub>3</sub>/C precursor, with the diameter size of 650 nm. The SEM, TEM and XRD pattern of the obtained calcined yellow product Bi<sub>2</sub>O<sub>3</sub> are shown in Fig S5. As can be seen from the SEM images (Fig S5a, b), the solid sphere size of Bi<sub>2</sub>O<sub>3</sub> decreases slightly, which is verified by the TEM image as manifested in Fig S5c. The crystalline and phase purity of the prepared Bi<sub>2</sub>O<sub>3</sub> microspheres were detected by the XRD (Fig S5d). It is obvious that the remarkable peaks correspond to the standard card of Bi<sub>2</sub>O<sub>3</sub> (JCPDS no. 27-0050/41-1449). The SEM elemental mapping images (Fig S6) for Bi<sub>2</sub>O<sub>3</sub> MSs confirm homogeneous distribution and presence of Bi and O elements, respectively.



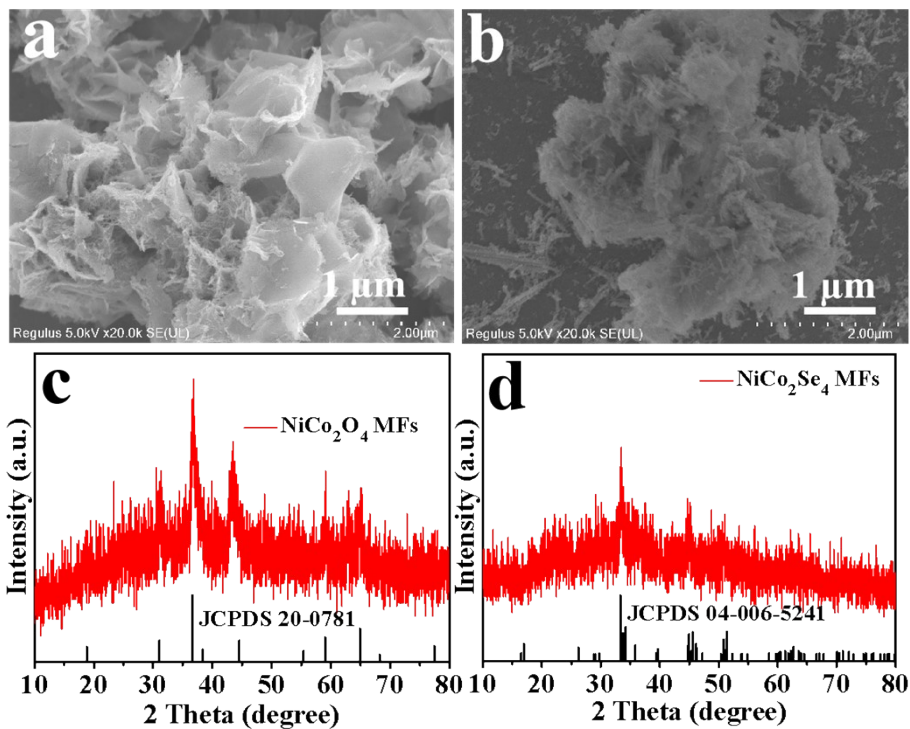

**Figure S7.** The SEM images of NiCo<sub>2</sub>O<sub>4</sub> MFs (a) and NiCo<sub>2</sub>Se<sub>4</sub> MFs (b). The XRD patterns of NiCo<sub>2</sub>O<sub>4</sub> MFs (c) and NiCo<sub>2</sub>Se<sub>4</sub> MFs (d).

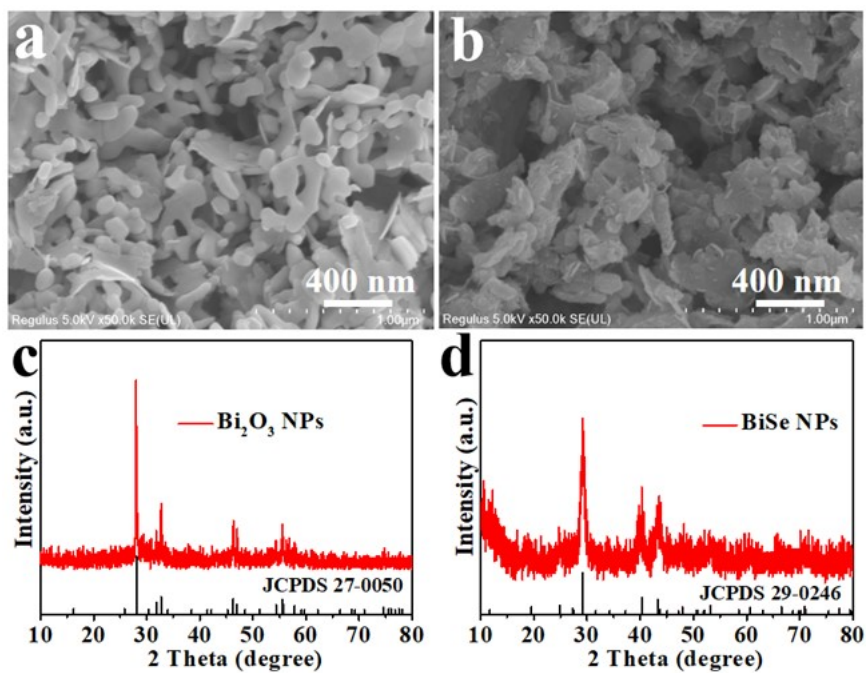

**Figure S8.** The SEM images of Bi<sub>2</sub>O<sub>3</sub> NPs (a) and BiSe NPs (b). The XRD patterns of Bi<sub>2</sub>O<sub>3</sub> NPs (c) and BiSe NPs (d).

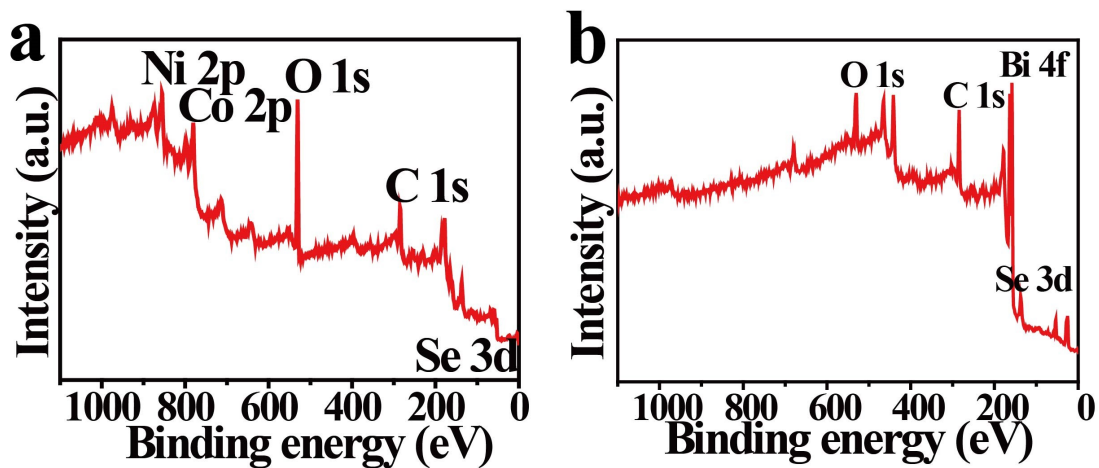

**Figure S9.** XPS survey spectrum of NiCo<sub>2</sub>Se<sub>4</sub> HMSs (a) and BiSe HMS (b).

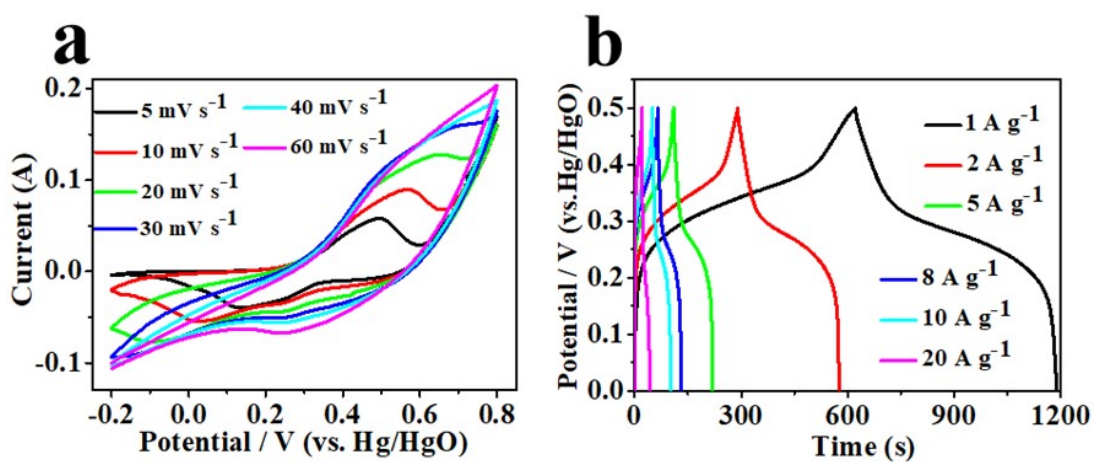

**Figure S10.** The CV curves at various scan rates and GCD curves at different current densities of the NiCo<sub>2</sub>Se<sub>4</sub> MFs electrode.

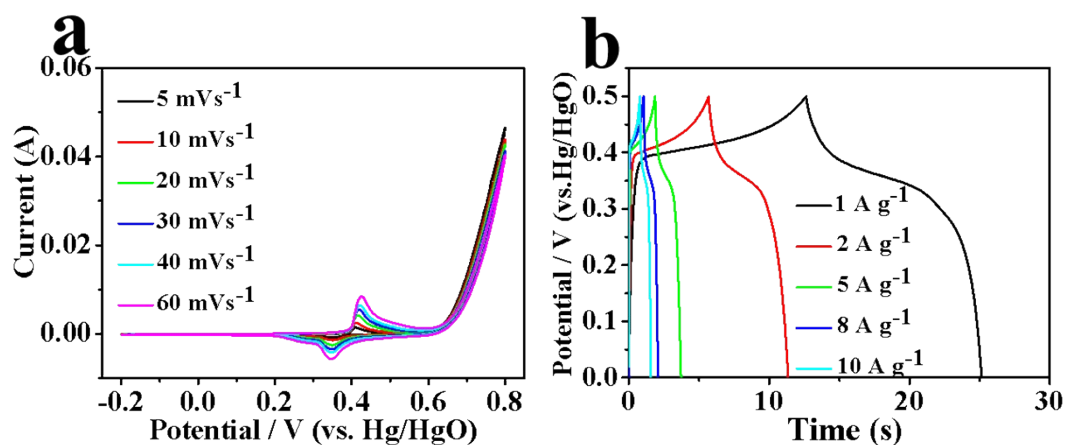

**Figure S11.** The CV curves at different scan rates (a) and the GCD curves at various current density (b) of the nickel foam electrode.

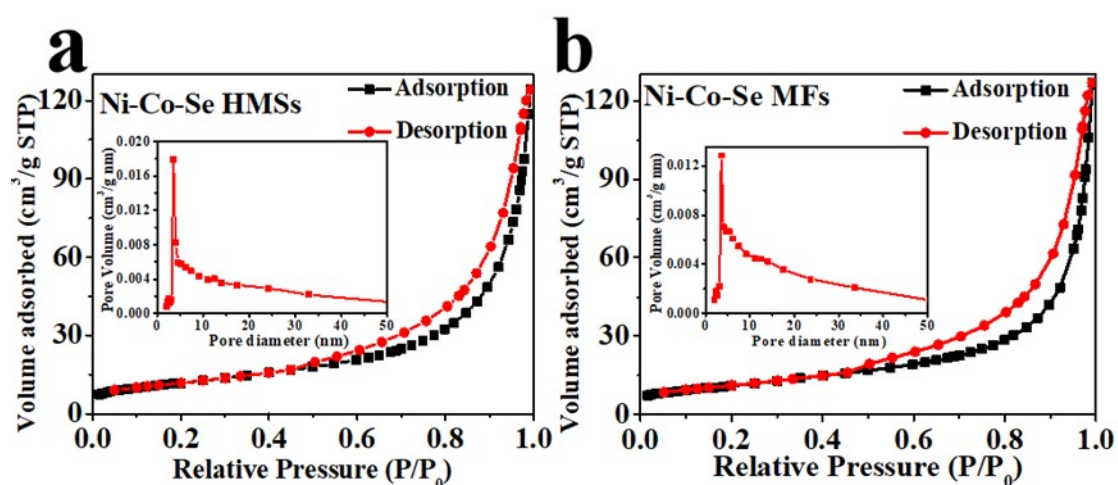

**Figure S12.** Nitrogen adsorption/desorption isotherm and pore size distribution curve (inset) of NiCo<sub>2</sub>Se<sub>4</sub> HMSs (a) and NiCo<sub>2</sub>Se<sub>4</sub> MFs (b).

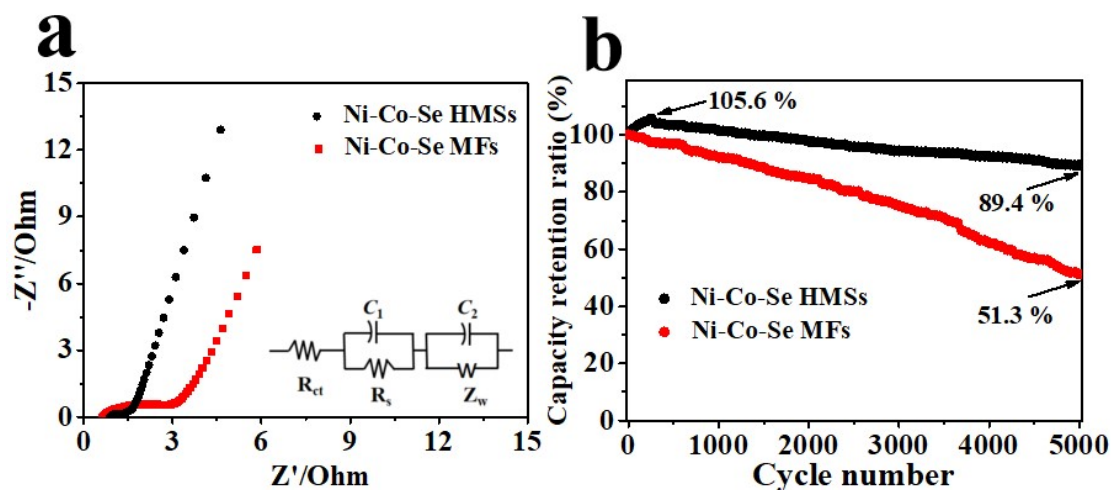

**Figure S13.** (a) The Nyquist plots of  $\text{NiCo}_2\text{Se}_4$  HMSs and  $\text{NiCo}_2\text{Se}_4$  MFs electrodes, and the inset is the equivalent circuit diagram, (b) the comparison of cycle performance for  $\text{NiCo}_2\text{Se}_4$  HMSs and  $\text{NiCo}_2\text{Se}_4$  MFs electrodes.

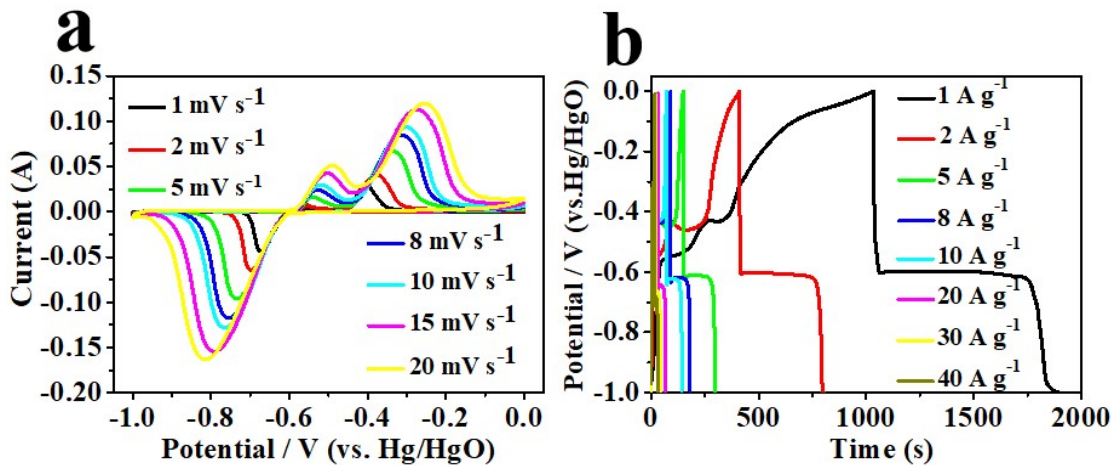

**Figure S14.** The CV curves at various scan rates and GCD curves at different current densities of the BiSe NPs electrode.



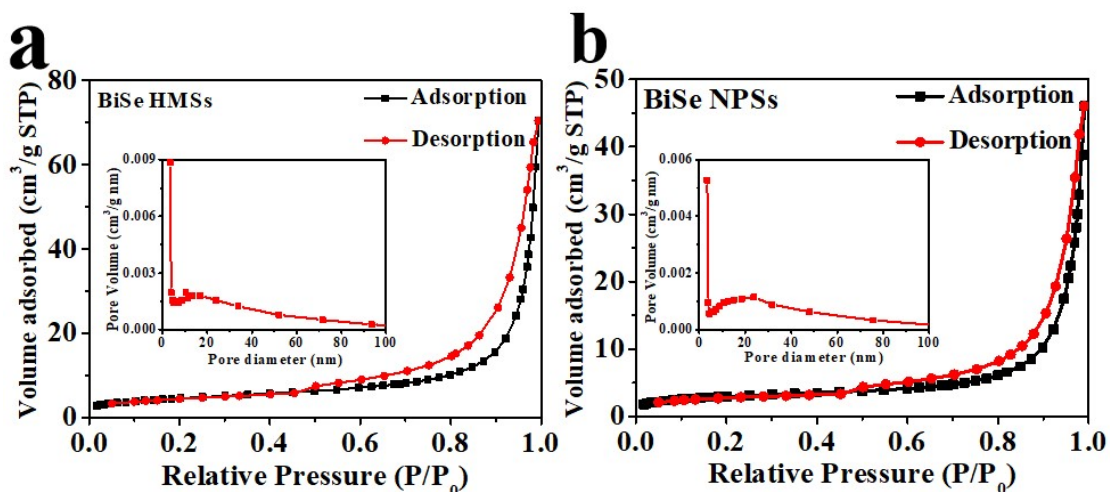

**Figure S15.** Nitrogen adsorption/desorption isotherm and pore size distribution curve (inset) of BiSe HMSs (a) and BiSe NPs (b).

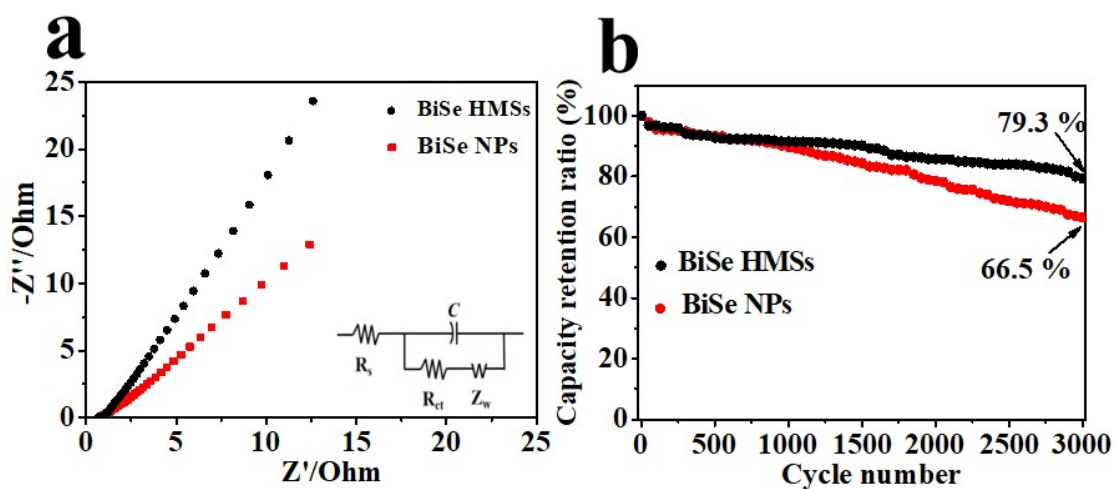

**Figure S16.** (a) The Nyquist plots of BiSe HMSs and BiSe MFs electrodes, the inset is the equivalent circuit diagram, (b) the comparison of cycle performance for BiSe HMSs and BiSe NPs electrodes.

## The electrochemical performances of NiCo<sub>2</sub>O<sub>4</sub> HMSs and NiCo<sub>2</sub>O<sub>4</sub> MFs electrodes.

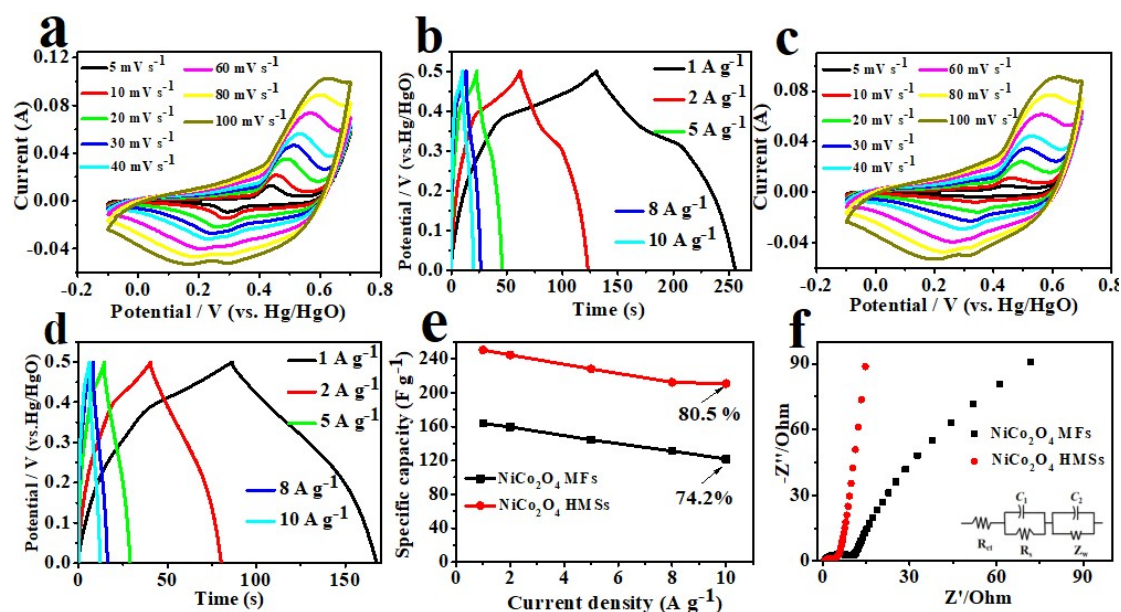

**Figure S17.** (a, c) the CV curves at various scan rates, (b, d) the GCD curves at different current densities, (e) the rate performance and the Nyquist plots of NiCo<sub>2</sub>O<sub>4</sub> HMSs (a, b) and NiCo<sub>2</sub>O<sub>4</sub> MFs (c, d) electrodes.

Fig. S17a, c displays the CV curves of NiCo<sub>2</sub>O<sub>4</sub> HMSs and NiCo<sub>2</sub>O<sub>4</sub> MFs electrodes at different scan rates with the potential window of -0.1-0.7 V. And a pair of redox peaks indicate the pseudocapacitance behavior of NiCo<sub>2</sub>O<sub>4</sub> in 3 M KOH electrolyte. The GCD curves of NiCo<sub>2</sub>O<sub>4</sub> HMSs and NiCo<sub>2</sub>O<sub>4</sub> MFs electrodes are shown in Fig. S 17b, d. The specific capacitances of NiCo<sub>2</sub>O<sub>4</sub> HMSs electrode are calculated to 250.4, 244.5, 228, 212.3 and 210.6 F g<sup>-1</sup> at various current densities of 1-10 A g<sup>-1</sup>, respectively. And NiCo<sub>2</sub>O<sub>4</sub> MFs electrode delivers the capacitances of 163.8, 159.5, 144.3, 131 and 121.6 F g<sup>-1</sup>. As shown in Fig. S17e, NiCo<sub>2</sub>O<sub>4</sub> HMSs exhibits higher rate capability of 80.5 % than NiCo<sub>2</sub>O<sub>4</sub> MFs electrode (74.2 %). As shown in Fig. S17f, the fitting results proves that

NiCo<sub>2</sub>O<sub>4</sub> HMSs electrode ( $R_{ct} = 3.80 \Omega$ ,  $R_s = 0.68 \Omega$ ) has a higher electrical conductivity and faster electron transport compared to NiCo<sub>2</sub>O<sub>4</sub> MFs electrode ( $R_{ct} = 8.03 \Omega$ ,  $R_s = 0.74 \Omega$ ).

### **The electrochemical performances of Bi<sub>2</sub>O<sub>3</sub> MSs and Bi<sub>2</sub>O<sub>3</sub> NPs electrodes.**

The CV curves exhibit a pair of redox peaks in Fig. S18a,c correspond to the following reactions for Bi<sub>2</sub>O<sub>3</sub>[1]:  $\text{Bi}_2\text{O}_3 + 3\text{H}_2\text{O} + 6\text{e}^- \leftrightarrow 2\text{Bi} + 6\text{OH}^-$ , implying the typical pseudocapacitive behaviors [2]. A small peak at about -0.5 V, which may be ascribe to the catalytic induction or oxidation of Bi according to other literatures[3, 4]. Fig. S18b, d show the GCD curves of Bi<sub>2</sub>O<sub>3</sub> MSs and Bi<sub>2</sub>O<sub>3</sub> NPs electrodes at different current densities in 3 M KOH electrolyte. The specific capacitances of Bi<sub>2</sub>O<sub>3</sub> MSs electrode with increasing current densities of 1-20 A g<sup>-1</sup> are 914, 882.4, 807, 792, 788 and 80 F g<sup>-1</sup>, respectively. Compared to Bi<sub>2</sub>O<sub>3</sub> MSs, the specific capacitances of Bi<sub>2</sub>O<sub>3</sub> NPs electrode are 613.5, 575.5, 531, 529.2, 521.4 and 45.2 F g<sup>-1</sup>, respectively. Bi<sub>2</sub>O<sub>3</sub> MSs electrode exhibits higher specific capacitance (914 F g<sup>-1</sup> at 1 A g<sup>-1</sup>) than Bi<sub>2</sub>O<sub>3</sub> NPs electrode (613.4 F g<sup>-1</sup> at 1 A g<sup>-1</sup>). As shown in Fig. S18e, when increasing current densities from 1 to 10 A g<sup>-1</sup>, Bi<sub>2</sub>O<sub>3</sub> MSs and Bi<sub>2</sub>O<sub>3</sub> NPs electrodes both deliver better rate capabilities (86.2 % and 85 %), while the capacitances decrease at 20 A g<sup>-1</sup> rapidly, due to the lack of time for

redox reactions. Similarly, the EIS technique is also employed to understand that  $\text{Bi}_2\text{O}_3$  MSs electrode has better electrochemical performance than  $\text{Bi}_2\text{O}_3$  NPs electrode. A large slope of line at low-frequency region, a small semicircle ( $R_{ct} = 0.07 \Omega$ ) and short x-intercept ( $R_s = 0.79 \Omega$ ) at high-frequency region, demonstrating  $\text{Bi}_2\text{O}_3$  MSs electrode has a higher electric conductivity and fast ion diffusion/ charge transport, compared with the fitting results ( $R_{ct} = 7.21 \Omega$ ,  $R_s = 1.02 \Omega$ ) for  $\text{Bi}_2\text{O}_3$  NPs electrode (Fig. S18f).

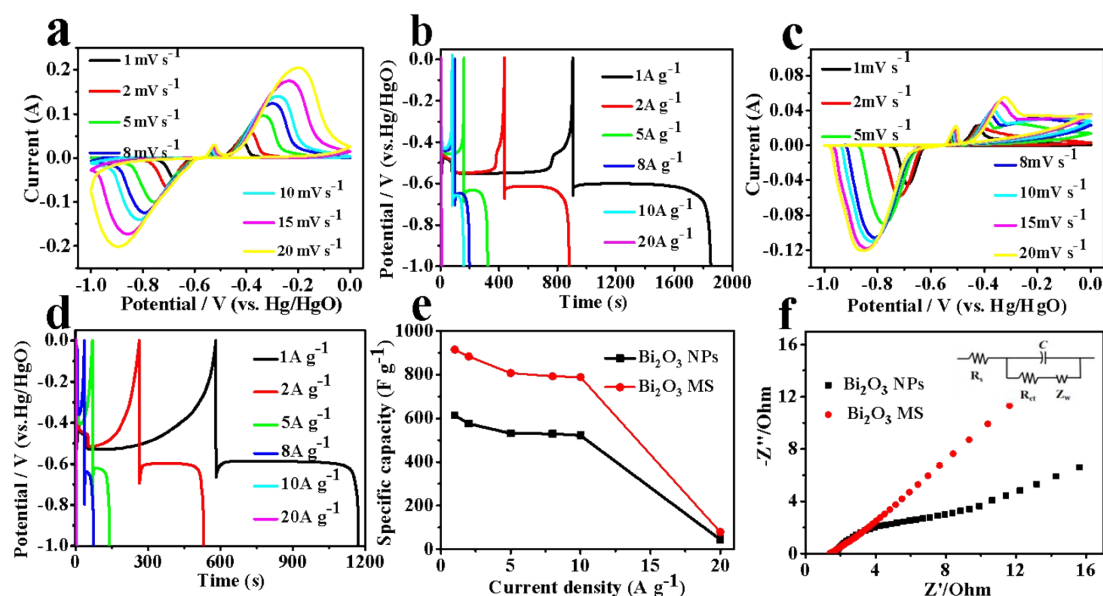

**Figure S18.** (a, c) the CV curves at various scan rates, (b, d) the GCD curves at different current densities, (e) the rate performance and the Nyquist plots of the  $\text{Bi}_2\text{O}_3$  MSs (a, b) and  $\text{Bi}_2\text{O}_3$  NPs (c, d) electrodes.

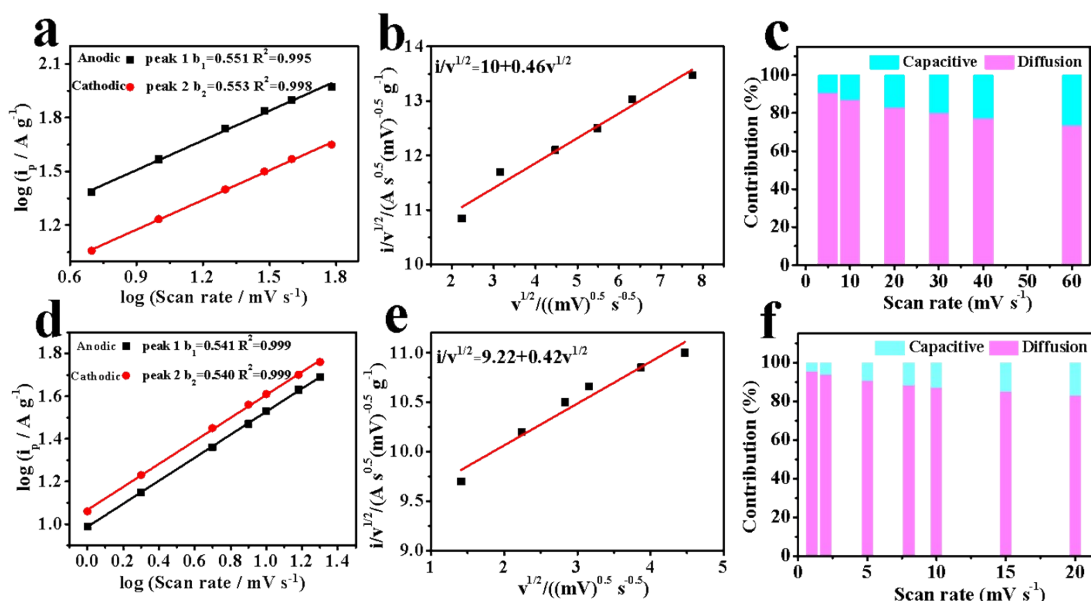

**Figure S19.** (a, d) determination of b value using the relationship

between  $\log(i_p / A g^{-1})$  and  $\log(\text{scan rate} / mV s^{-1})$ , (b, e)  $i/v^{1/2}$  vs.  $v^{1/2}$  plot using the anodic peak 1 current, (c, f) the capacitive and diffusion-controlled contributions of the Ni-Co-Se/BiSe HMSs electrode and the total capacitance contributions, respectively.

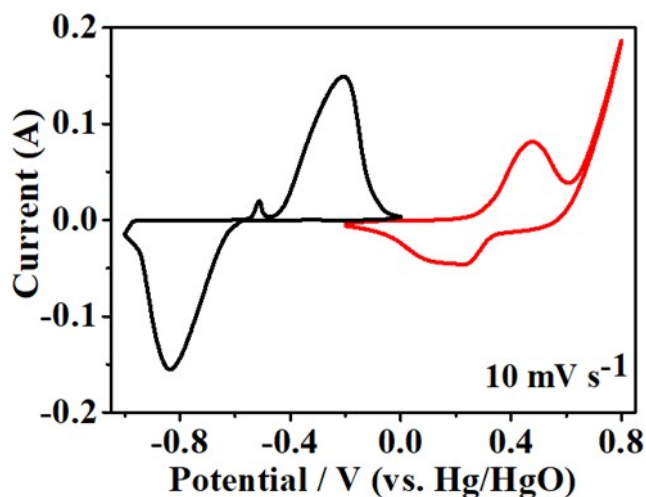

**Figure S20.** CV curves of the BiSe HMSs and Ni-Co-Se HMSs electrodes obtained at  $10 mV s^{-1}$  in a three-electrode system.



**Table S1. The electrochemical performance comparison of NiCo<sub>2</sub>Se<sub>4</sub> HMSs electrode with the other previously reported**

| Electrode materials                             | Electrolyte | C <sub>sp</sub> (F g <sup>-1</sup> )<br>/C.D (A g <sup>-1</sup> ) | CR(%) / CN   | Ref.      |
|-------------------------------------------------|-------------|-------------------------------------------------------------------|--------------|-----------|
| NiCo <sub>2</sub> Se <sub>4</sub> HMSs          | 3 M KOH     | 1874.6/1                                                          | 89.4/5000    | This work |
| CoNi <sub>2</sub> Se <sub>4</sub> nanoparticles | 6 M KOH     | 1585/1                                                            | 83.31/3000   | [5]       |
| NiSe <sub>2</sub> /CoSe <sub>2</sub>            | 3 M KOH     | 1668/1                                                            | 84.7/5000    | [6]       |
| CoSe <sub>2</sub> nanosheets                    | 6 M KOH     | 333/1                                                             | 100.97/25000 | [7]       |
| NiSe nanoparticles on G                         | 6 M KOH     | 1280/1                                                            | 98/2500      | [8]       |
| NiCo <sub>2</sub> Se <sub>4</sub> /RGO          | 6 M KOH     | 1776/2                                                            | 86/3000      | [9]       |
| NiSe-Ni <sub>0.85</sub> Se                      | 2 M KOH     | 1487/1                                                            | 80/5000      | [10]      |

C<sub>sp</sub>: Specific capacitance, C.D Current density, CR: Capacitance retention, CN: cycling number, G: graphene nanosheets, RGO: reduced graphene oxide.

**Table S2. The electrochemical performance comparison of BiSe HMSs electrode with the other previously reported**

| Electrode materials                                        | Electrolyte                           | C <sub>sp</sub> (F g <sup>-1</sup> )<br>/C.D (A g <sup>-1</sup> ) | CR(%) / CN | Ref.      |
|------------------------------------------------------------|---------------------------------------|-------------------------------------------------------------------|------------|-----------|
| BiSe HMSs                                                  | 3 M KOH                               | 1293/1                                                            | 78/3000    | This work |
| Bi <sub>2</sub> Se <sub>3</sub> -MnO <sub>2</sub> nanotube | 0.5 M Na <sub>2</sub> SO <sub>4</sub> | 438/1                                                             | 86/2000    | [11]      |
| Bi <sub>2</sub> O <sub>3</sub> @C microrods                | 1 M KOH                               | 1378/1                                                            | 93/4000    | [12]      |
| GF@BiFeO <sub>3</sub> -NC                                  | 6 M KOH                               | 456/1                                                             | 71.4/6000  | [13]      |
| Bi <sub>18</sub> SeO <sub>29</sub> /BiSe                   | 2 M KOH                               | 471.3/0.5                                                         | 68/5000    | [14]      |
| FeO <sub>x</sub> nanoparticle                              | 6 M KOH                               | 436/1                                                             | 89/5000    | [15]      |
| graphene-Mn <sub>3</sub> O <sub>4</sub>                    | 1 M H <sub>2</sub> SO <sub>4</sub>    | 660/0.2                                                           | 89/4000    | [16]      |

GF: graphite fibers, NC: N-doped carbon.

## References

- [1] G. Zan, T. Wu, P. Hu, Y. Zhou, S. Zhao, S. Xu, J. Chen, Y. Cui, Q. Wu, An approaching-theoretical-capacity anode material for aqueous battery: Hollow hexagonal prism  $\text{Bi}_2\text{O}_3$  assembled by nanoparticles, *Energy Stor. Mater.* 28 (2020) 82-90.
- [2] O. Üner, N. Aslan, A. Sarioğlu, F. Semerci, M.M. Koç, Facile preparation of commercial  $\text{Bi}_2\text{O}_3$  nanoparticle decorated activated carbon for pseudocapacitive supercapacitor applications, *J. Mater. Sci.: Mater. Electron.* 32 (2021) 15981-15994.
- [3] S.X. Wang, C.C. Jin, W.J. Qian,  $\text{Bi}_2\text{O}_3$  with activated carbon composite as a supercapacitor electrode, *J. Alloys Compd.* 615 (2014) 12-17.
- [4] Y. Qiu, H. Fan, X. Chang, H. Dang, Q. Luo, Z. Cheng, Novel ultrathin  $\text{Bi}_2\text{O}_3$  nanowires for supercapacitor electrode materials with high performance, *Appl. Surf. Sci.* 434 (2018) 16-20.
- [5] J.A. Rajesh, Y.-H. Lee, Y.-H. Yun, V.H.V. Quy, S.-H. Kang, H. Kim, K.-S. Ahn, Potentiostatic deposition of  $\text{CoNi}_2\text{Se}_4$  nanostructures on nickel foam as efficient battery-type electrodes for supercapacitors, *J. Electroanal Chem.* 850 (2019) 113371.
- [6] G. Qu, X. Zhang, G. Xiang, Y. Wei, J. Yin, Z. Wang, X. Zhang, X. Xu, ZIF-67 derived hollow Ni-Co-Se nano-polyhedrons for flexible hybrid supercapacitors with remarkable electrochemical performances, *Chin. Chem. Lett.* 31 (2020) 2007-2012.
- [7] S. Liu, S. Sarwar, J. Wang, H. Zhang, T. Li, J. Luo, X. Zhang, The microwave synthesis of porous  $\text{CoSe}_2$  nanosheets for super cycling performance supercapacitors, *J. Mater. Chem. C* 9 (2021) 228-237.
- [8] B. Kirubasankar, V. Murugadoss, J. Lin, T. Ding, M. Dong, H. Liu, J. Zhang, T. Li, N. Wang, Z. Guo, S. Angaiah, In situ grown nickel selenide on graphene nanohybrid electrodes for high energy density asymmetric supercapacitors, *Nanoscale* 10 (2018) 20414-20425.
- [9] S. Ghosh, P. Samanta, N.C. Murmu, T. Kuila, Investigation of electrochemical charge storage in nickel-cobalt-selenide/reduced graphene oxide composite electrode and its hybrid supercapacitor device, *J. Alloys Compd.* 835 (2020) 155432.
- [10] Y. Bai, W. Shen, K. Song, S. Zhang, Y. Wang, T. Xu, J. Xu, S. Dai, X. Wang, Controlled synthesis of  $\text{NiSe-Ni}_{0.85}\text{Se}$  nanocomposites for high-performance hybrid supercapacitors, *J. Electroanal Chem.* 880 (2021) 114795.
- [11] M. Pradhan, R. Chakraborty, S. Rudra, S. Koley, P.K. Maji, A.K. Nayak, S. Das, U. Nandi, Intercalation pseudocapacitance in  $\text{Bi}_2\text{Se}_3\text{-MnO}_2$  nanotube composite for high electrochemical energy storage, *Electrochim. Acta* 367 (2021) 137531.
- [12] X. Yu, J. Sun, W. Zhao, S. Zhao, H. Chen, K. Tao, Y. Hu, L. Han, MOF-derived  $\text{Bi}_2\text{O}_3\text{@C}$  microrods as negative electrodes for advanced asymmetric supercapacitors, *RSC Adv.* 10 (2020) 14107-14112.

- [13] Q. Pan, C. Yang, Q. Jia, W. Qi, H. Wei, M. Wang, S. Yang, B. Cao, Oxygen-deficient BiFeO<sub>3</sub>-NC nanoflake anodes for flexible battery-supercapacitor hybrid devices with high voltage and long-term stability, *Chem. Eng. J.* 397 (2020) 125524.
- [14] G. Ma, F. Hua, K. Sun, E. Fenga, H. Peng, Z. Zhang, Z. Lei, Nanostructure selenium compounds as pseudocapacitive electrodes for high-performance asymmetric supercapacitor, *R. Soc. Open Sci.* 5 (2018) 171186.
- [15] E. Samuel, B. Joshi, H.S. Jo, Y.I. Kim, S. An, M.T. Swihart, J.M. Yun, K.H. Kim, S.S. Yoon, Carbon nanofibers decorated with FeO nanoparticles as a flexible electrode material for symmetric supercapacitors, *Chem. Eng. J.* 328 (2017) 776-784.
- [16] R. Boddula, R. Bolagam, P. Srinivasan, Incorporation of graphene-Mn<sub>3</sub>O<sub>4</sub> core into polyaniline shell: supercapacitor electrode material, *Ionics* 24 (2017) 1467-1474.
